# Supplementary material for: An Interpretable Radiomics Model Based on Two-Dimensional Shear Wave Elastography for Predicting Symptomatic Post-Hepatectomy Liver Failure in Patients with Hepatocellular Carcinoma
Source: MDPI journal article supplement (doi:10.3390/cancers15215303), 2023-11-06
Supplement: s1 [file s1]

# **An Interpretable Radiomics Model Based on Two-dimensional Shear Wave Elastography for Predicting Symptomatic Post-hepatectomy Liver Failure in Patients with Hepatocellular Carcinoma**

## **Supplementary Material**

### **Method S1. Formulas for Child-Pugh score, ALBI score and MELD score**

- (1) The Child-Pugh score was based on the total bilirubin, albumin, prothrombin time, and the clinical findings of encephalopathy and ascites. It was graded as 5–6 points for Child-Pugh grade A; 7–9 points for Child-Pugh grade B; and 10–15 points for Child-Pugh grade C.
- (2) The following formula determined the ALBI score:  $(\log_{10} \text{bilirubin } \mu\text{mol/L} \times 0.66) + (-0.085 \times \text{albumin g/L})$ . The ALBI score was graded as: score  $\leq -2.60$  as ALBI grade 1;  $-2.60 < \text{score} \leq -1.39$  as ALBI grade 2; and score  $> -1.39$  as ALBI grade 3.
- (3) The MELD score was calculated according to the formula:  $3.8 \times \log_e (\text{bilirubin (mg/dl)}) + 11.2 \times \log_e (\text{INR}) + 9.6 \times \log_e (\text{creatinine (mg/dl)}) + 6.4 \times (\text{etiology: 0 if cholestatic or alcoholic, 1 otherwise})$ .

Table S1 Python packages or functions

| Purposes                     | Packages                                                                            | Version |
|------------------------------|-------------------------------------------------------------------------------------|---------|
| Five-fold cross-validation   | sklearn.model_selection.StratifiedKFold                                             | 0.23.1  |
| AUC values                   | sklearn.metrics.auc                                                                 | 0.23.1  |
| ROC plots                    | sklearn.metrics.plot_roc_curve                                                      | 0.23.1  |
| Diagnosis values             | sklearn.metrics.confusion_matrix                                                    | 0.23.1  |
| HCR Features standardization | sklearn.preprocessing.StandardScaler                                                | 0.23.1  |
| HCR Features selection       | sklearn.feature_selection.VarianceThreshold;<br>sklearn.feature_selection.RFE       | 0.23.1  |
| HCR Model finetune           | sklearn.model_selection.GridSearchCV                                                | 0.23.1  |
| HCR Modeling                 | sklearn.ensemble.RandomForestClassifier;<br>sklearn.linear_model.LogisticRegression | 0.23.1  |
| DL modeling                  | pytorch                                                                             | 1.10.1  |
| Pretrained DL model          | torchvision.models                                                                  | 0.11.2  |
| DL data augmentation         | albumentations                                                                      | 1.1.0   |
| SHAP analysis                | shap                                                                                | 0.40.0  |
| Grad-CAM                     | captum                                                                              | 0.4.1   |

Note.—The setting of main parameters for random forest modeling is as follows: `n_estimators = 200`,  
`max_depth = 2`, `max_features = 1`
